# Supplementary material
Source: HighWire-hosted journal article supplement (http://www.jneurosci.org/highwire/filestream/599995/field_highwire_adjunct_files/3/Figure_S4.pdf)

**A**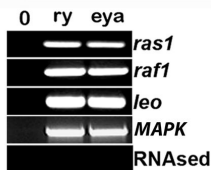**B**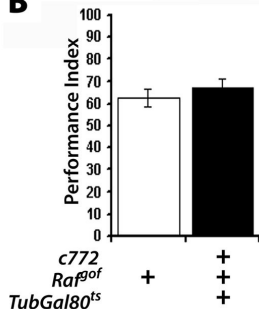**C**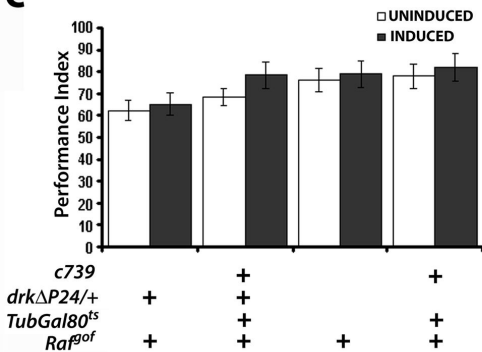**D**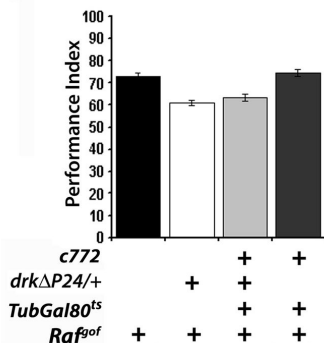**E**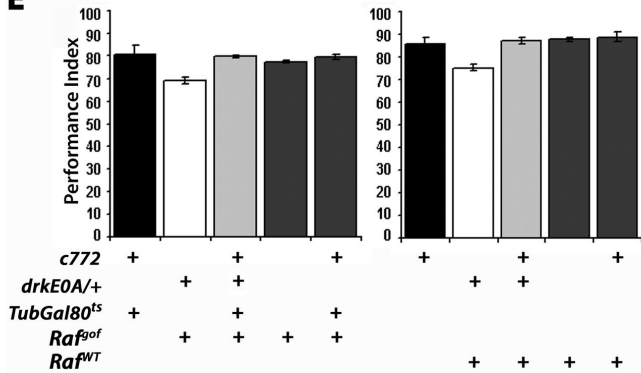

Supplement: Figure_S4.pdf [file Figure_S4.pdf]
